# Supplementary material for: Randomised comparison of postpolypectomy surveillance intervals following a two-round baseline colonoscopy: the Japan Polyp Study Workgroup
Source: HighWire-hosted journal article supplement (doi:10.1136/gutjnl-2020-321996), 2020-11-02
Supplement: gutjnl-2020-321996supp001_data_supplement.pdf [file gutjnl-2020-321996supp001_data_supplement.pdf]

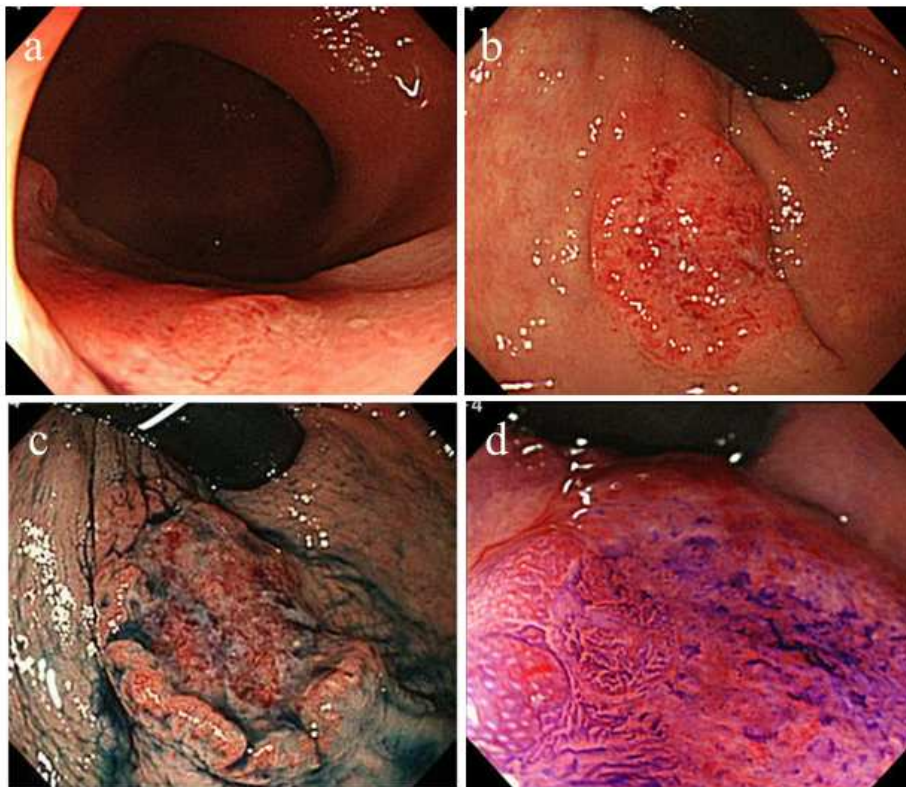

Supplementary figure 1. Metachronous advanced neoplasia identified as invasive cancer [T2N0M0 (Duke's stage B1), location: lower rectum (Rb), size: 20 mm]  
a: Forward view, b: Retroflexed view (conventional white-light), c: Chromoendoscopy (indigo carmine dye), d: Magnifying chromoendoscopy (crystal violet staining)
